# Supplementary material for: Effects of Highly Pathogenic Porcine Reproductive and Respiratory Syndrome Virus Infection on the Surface Glycoprofiling of Porcine Pulmonary Microvascular Endothelial Cells
Source: MDPI journal article supplement (doi:10.3390/v14112569), 2022-11-20
Supplement: s1 [file s1]

**Table S1. Lectin list in this study**

| <b>NO.</b> | <b>Name</b> | <b>Lectin</b> | <b>Full name</b>                                            |
|------------|-------------|---------------|-------------------------------------------------------------|
| 1          |             | ConA          | Concanavalin A                                              |
| 2          |             | GNA           | Galanthus nivalis Agglutinin                                |
| 3          |             | PHA-L         | Phaseolus vulgaris Leuko agglutinating Phytohem Agglutinin  |
| 4          |             | PHA-E         | Phaseolus vulgaris Erythroagglutinating Phytohem Agglutinin |
| 5          |             | DSA           | Datura stromonium Agglutinin                                |
| 6          |             | LCA           | Lens culinaris Agglutinin                                   |
| 7          |             | MAL-I         | Maackia amurensis Leuko Agglutinin-I                        |
| 8          |             | MAL-II        | Maackia amurensis Hem Agglutinin-II                         |
| 9          |             | SNA           | Sambucus nigra Agglutinin                                   |
| 10         |             | AAL           | Aleuria aurantia Leuko Agglutinin                           |
| 11         |             | UEA-I         | Ulex europeus Agglutinin-I                                  |
| 12         |             | LTA           | Lotus tetragonolobus Agglutinin                             |
| 13         |             | RCA-I         | Ricinus communis Agglutinin-I                               |

|    |         |                                                     |
|----|---------|-----------------------------------------------------|
| 14 | ECL     | Erythrina cristagalli Agglutinin                    |
| 15 | PNA     | Peanut Agglutinin                                   |
| 16 | Jacalin | Jacalin                                             |
| 17 | GSL-I   | Griffonia (Bandeiraea) simplicifolia Agglutinin-I   |
| 18 | WFA     | Wisteria floribunda Agglutinin                      |
| 19 | SBA     | Soybean Agglutinin                                  |
| 20 | HPA     | Helix pomatia Agglutinin                            |
| 21 | VVL     | Vicia villosa Agglutinin                            |
| 22 | DBA     | Dolichus biflorus Agglutinin                        |
| 23 | GSL-II  | Griffonia (Bandeiraea) simplicifolia Agglutinin- II |
| 24 | WGA     | Triticum vulgaris Wheat germ Agglutinin             |
| 25 | LEL     | Lycopersicon esculentum (Tomato) Agglutinin         |
| 26 | STL     | Solanum tuberosum Potata Agglutinin                 |

---
